# Supplementary material
Source: PubMed Central journal article supplement (PMC8494464)
Supplement: NIHMS1740518-supplement-1.pdf [file NIHMS1740518-supplement-1.pdf]

# Supplementary Figure 1: Glucose and C-peptide response on MMTT from baseline to 26 wks

● Imatinib, mean & 95% CI  
▲ Placebo, mean & 95% CI

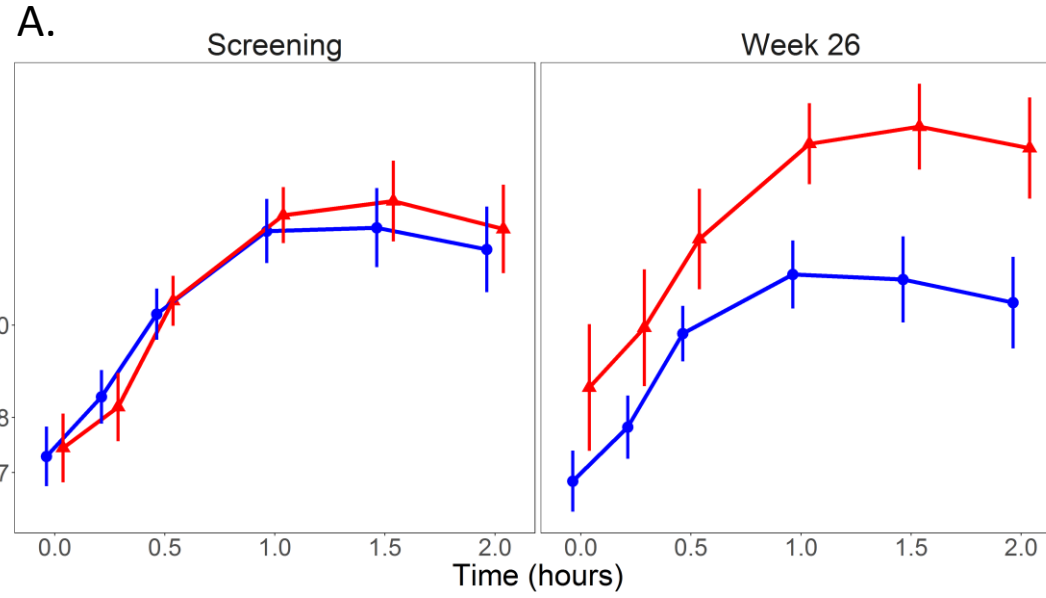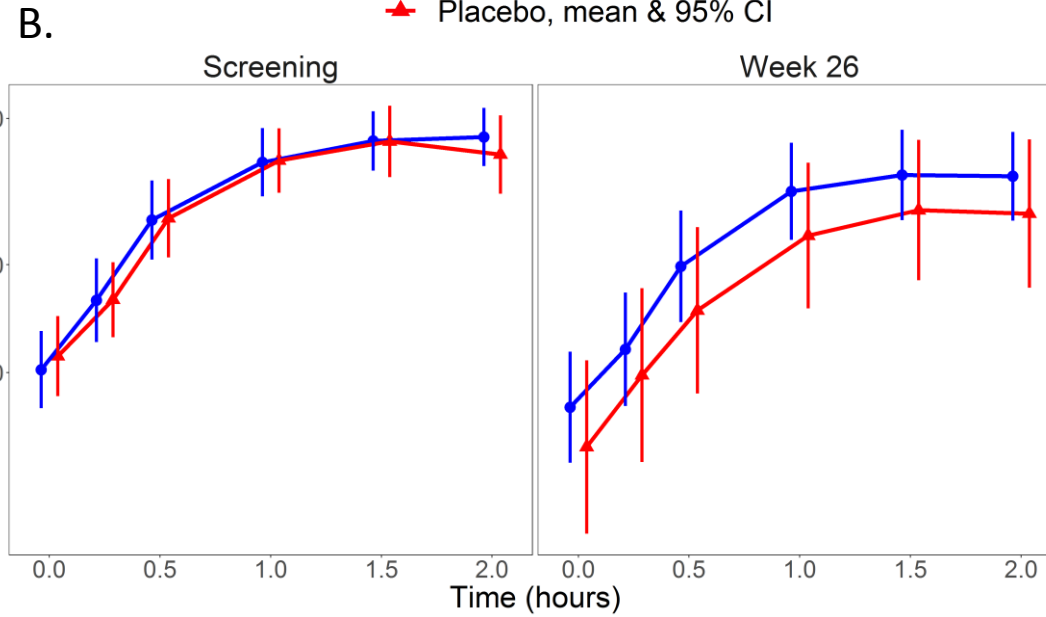

● Imatinib, mean & 95% CI  
▲ Placebo, mean & 95% CI

# Supplementary Figure 2: Circulating *INS* DNA over time

A.

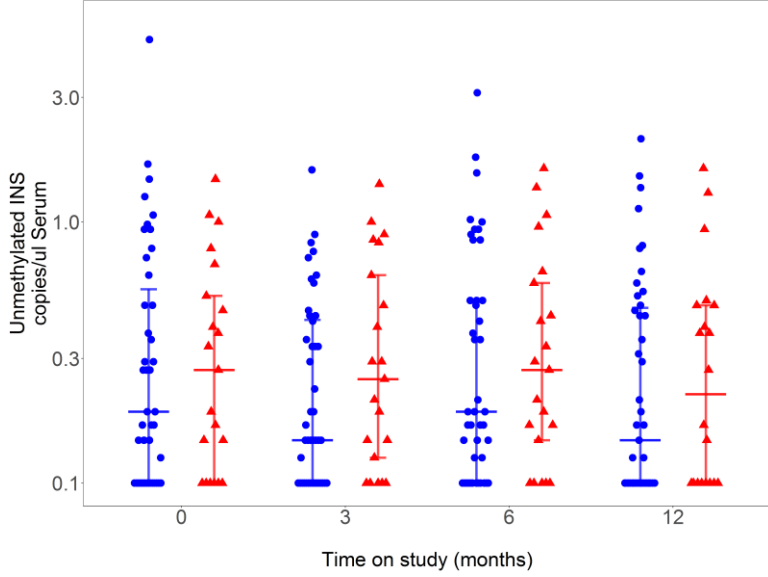

● Imatinib ▲ Placebo

Plots are median and inter-quartile range

# Supplementary Figure 2: Circulating *INS* DNA over time (cont.)

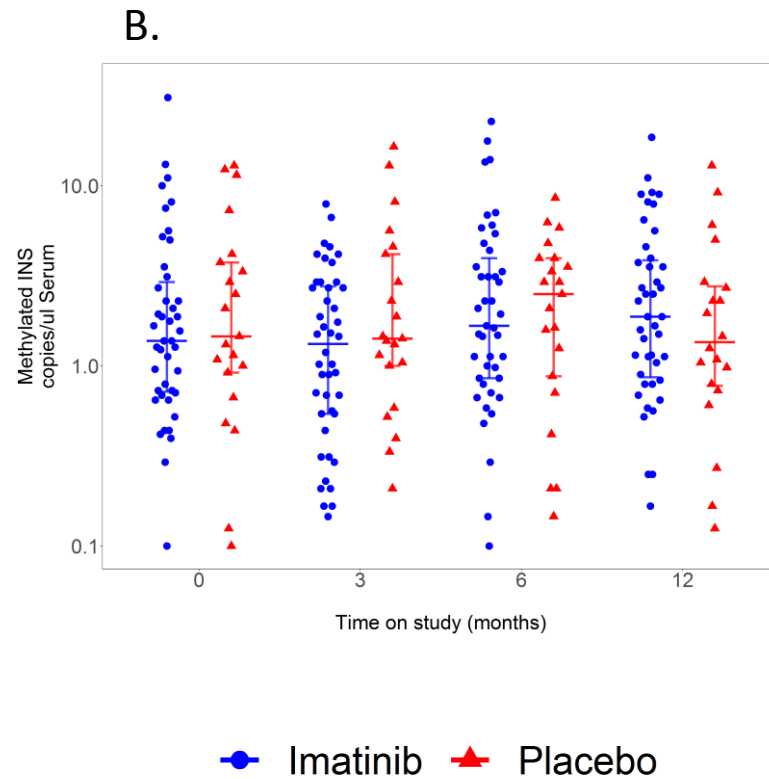

Plots are median and inter-quartile range

# Supplementary Figure 2: Circulating *INS* DNA over time (cont.)

C.

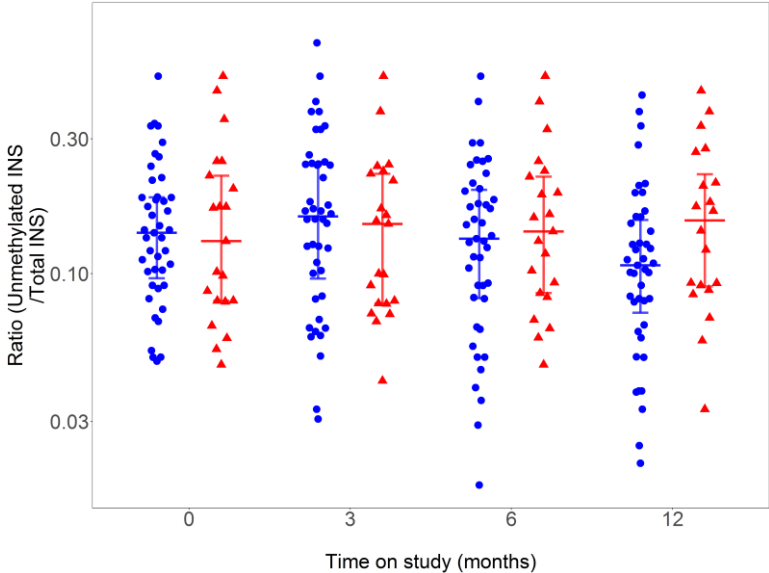

● Imatinib ▲ Placebo

Plots are median and inter-quartile range

# Supplement Figure 3A: Autoantibody titers over time

A.

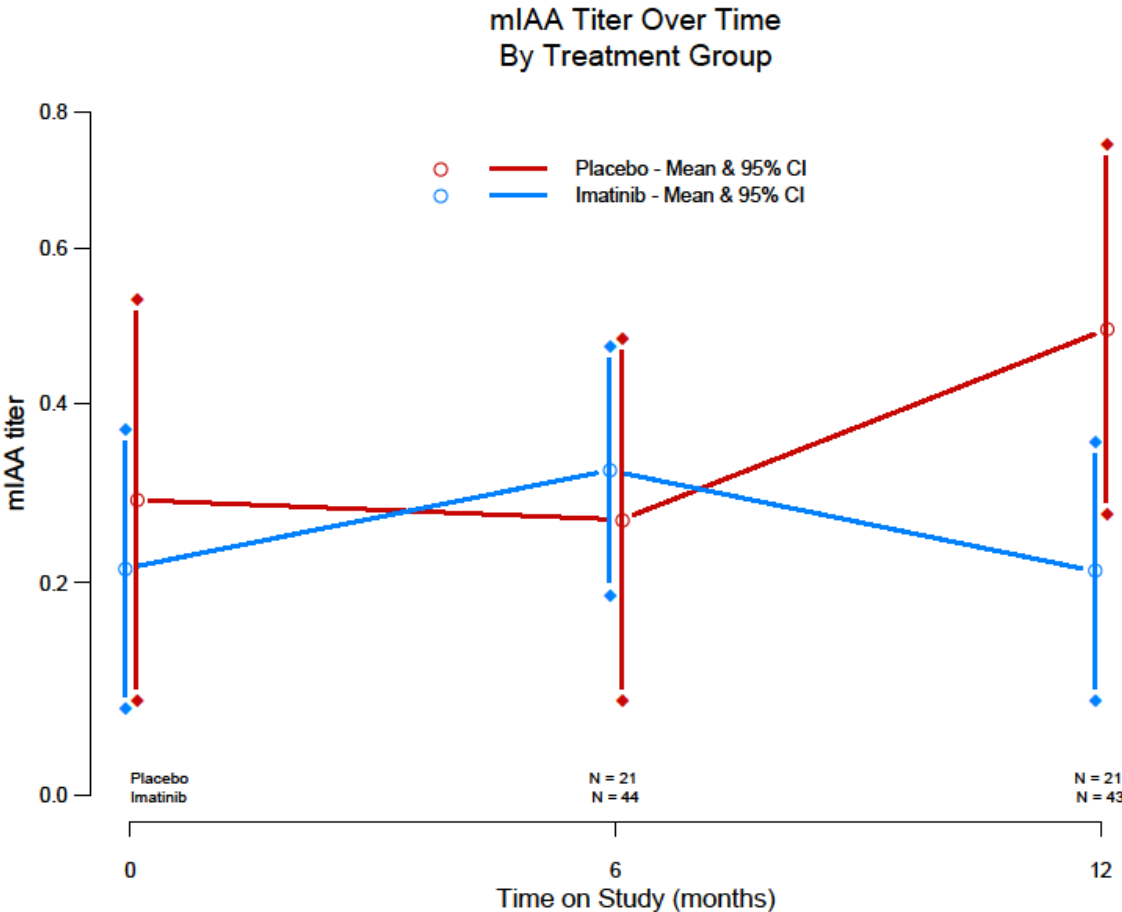

# Supplement Figure 3B: Autoantibody titers over time

B.

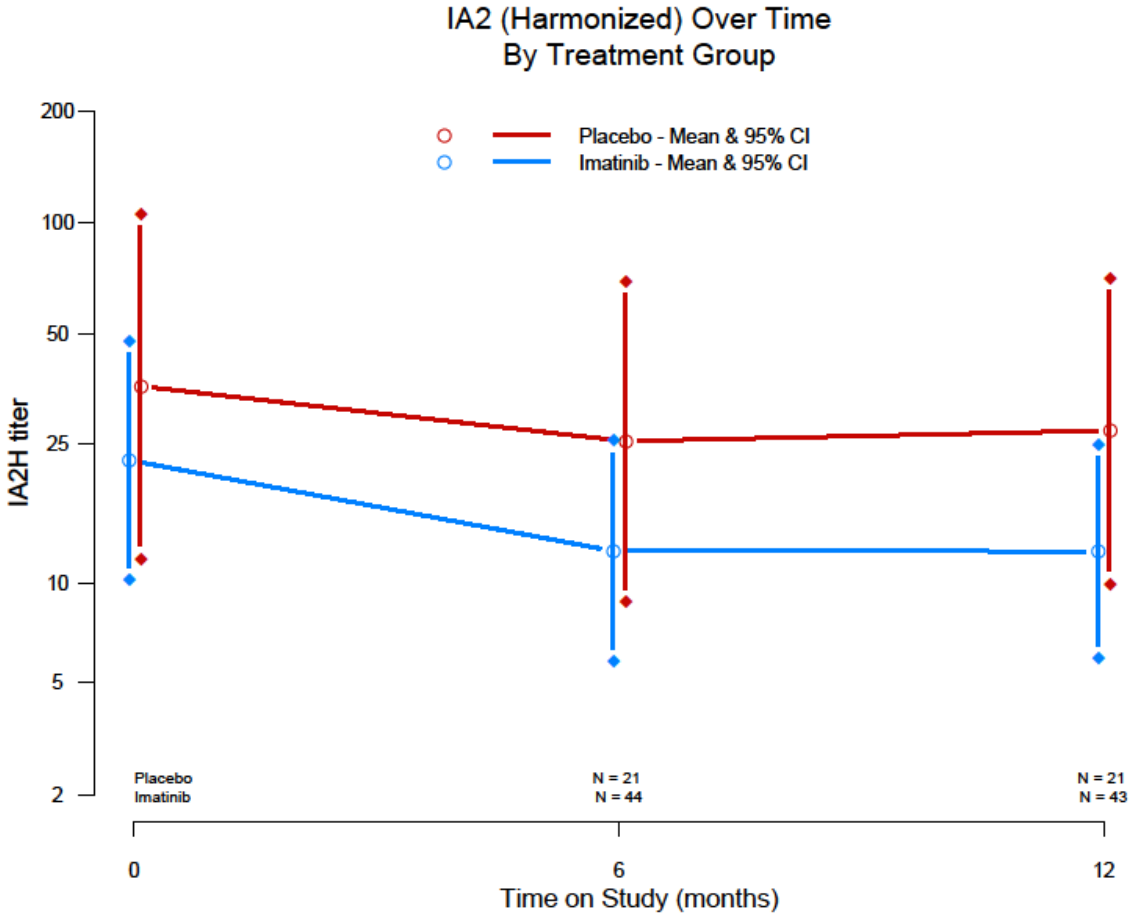

# Supplement Figure 3C: Autoantibody titers over time

C.

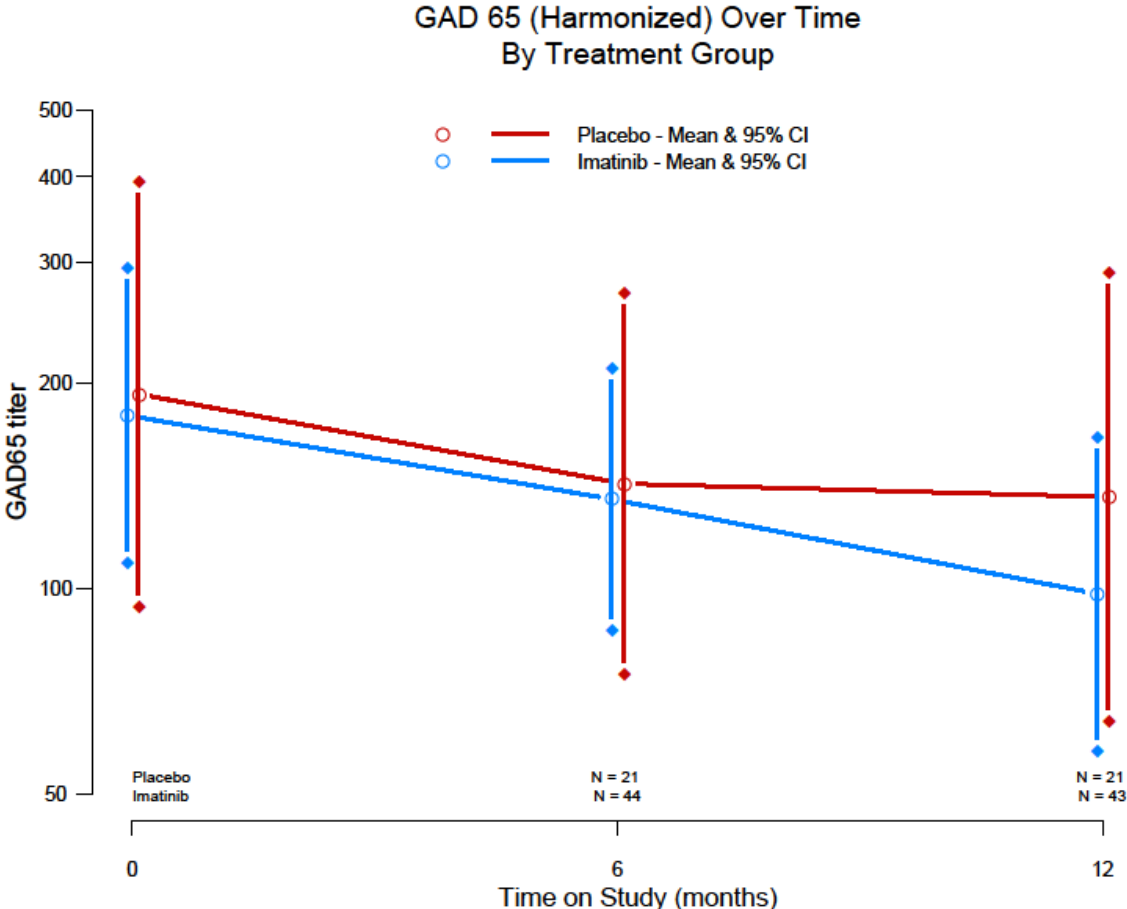

# Supplement Figure 3D: Autoantibody titers over time

D.

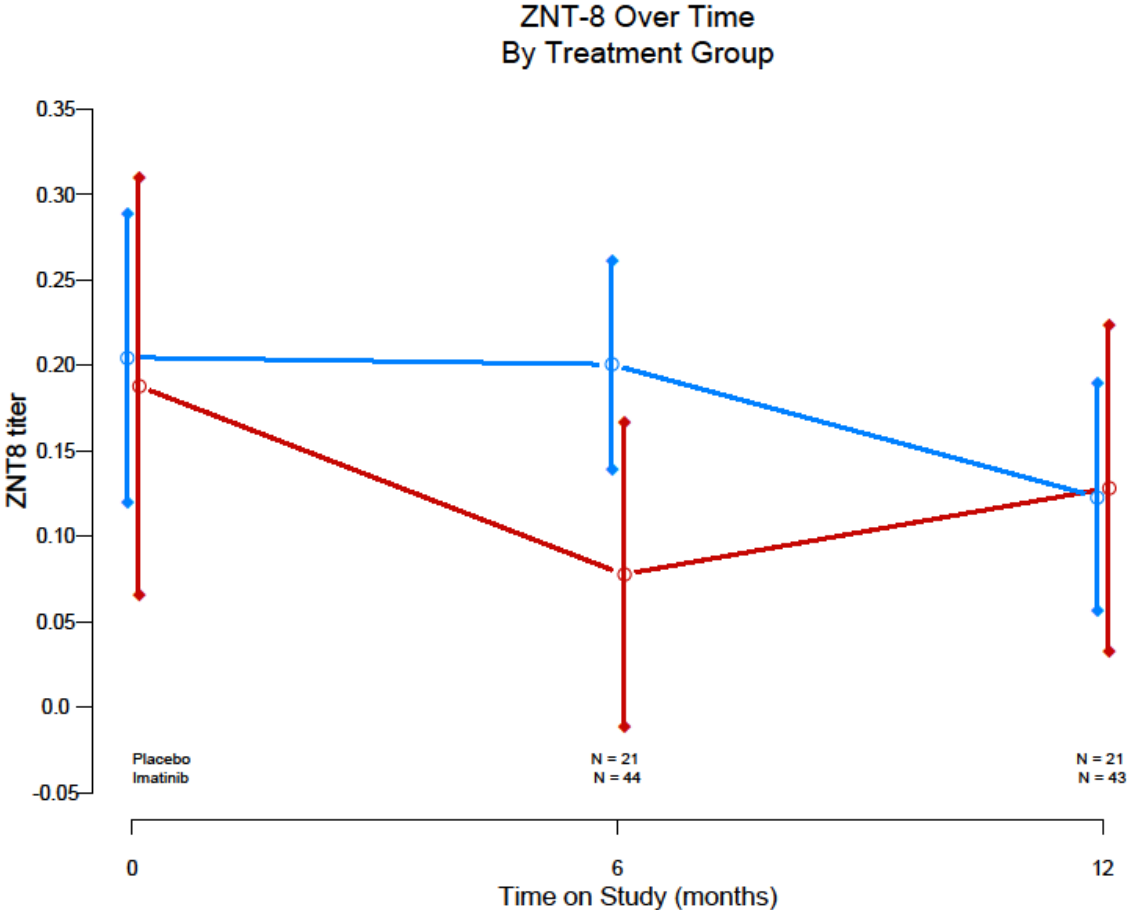



# Supplementary Figure 4: Immune cell subsets over time

A.

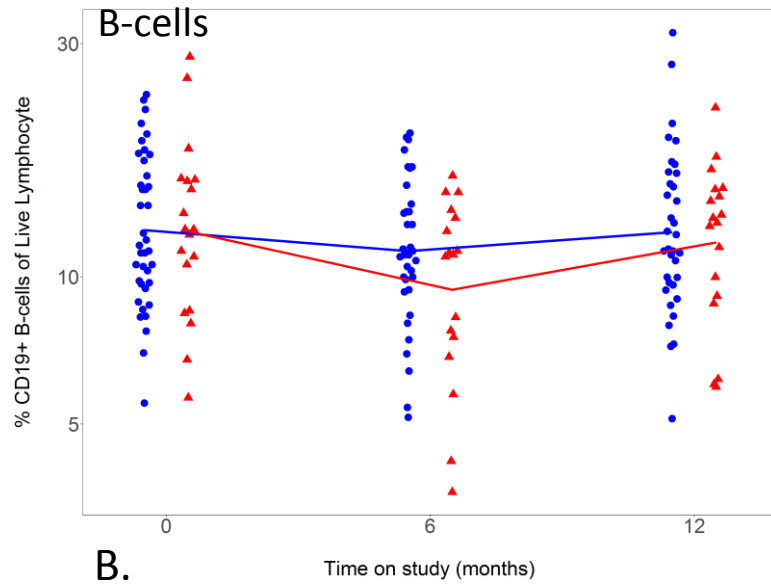

B.

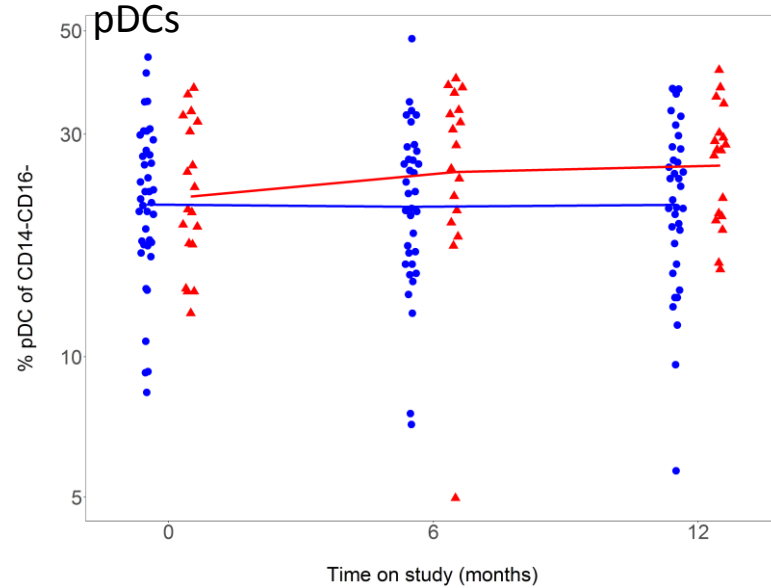

● Imatinib ▲ Placebo

# Supplementary Figure 4: Immune cell subsets over time (cont)

C.

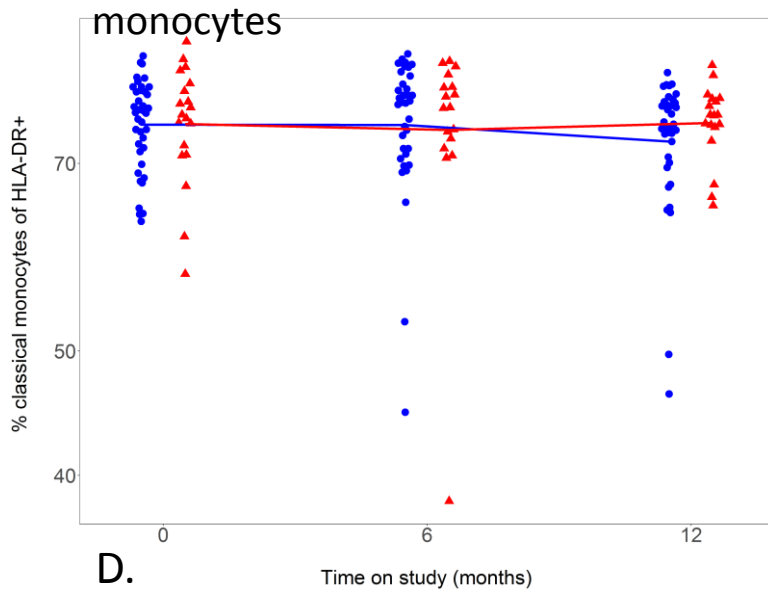

D.

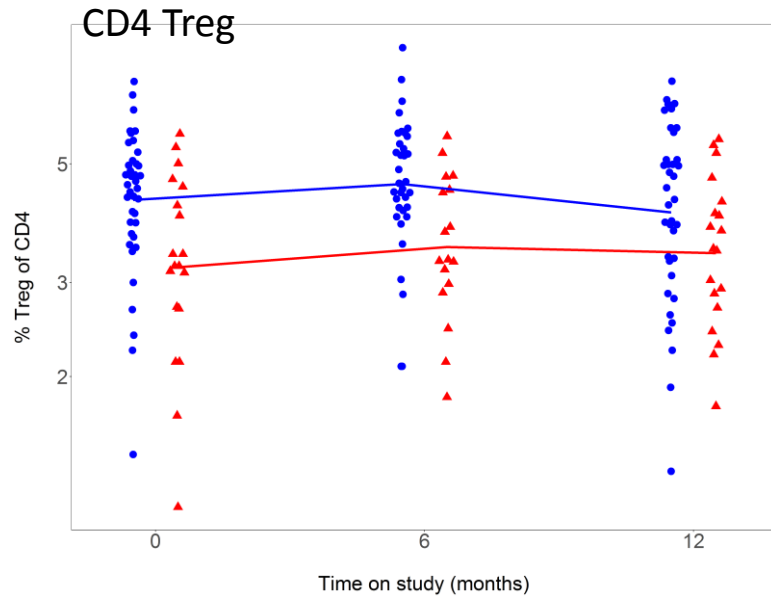

● Imatinib ▲ Placebo

# Supplementary Figure 4: Immune cell subsets over time (cont.)

E.

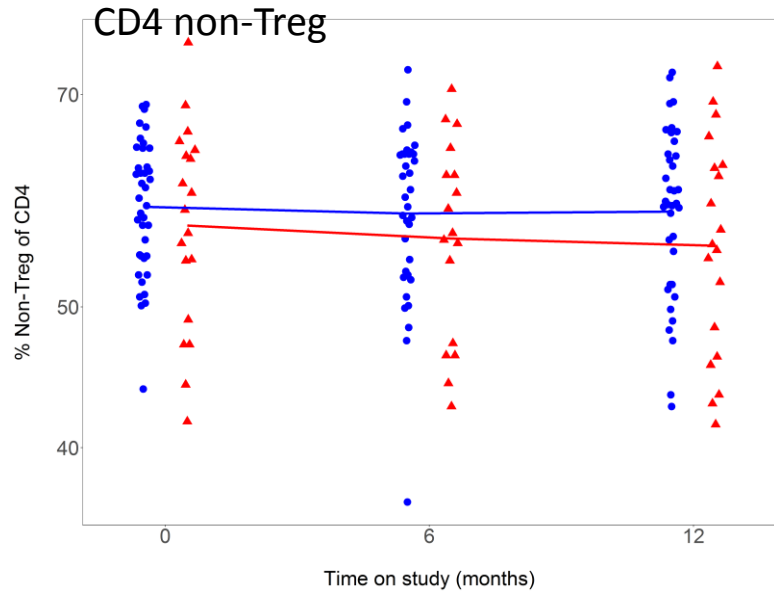

F.

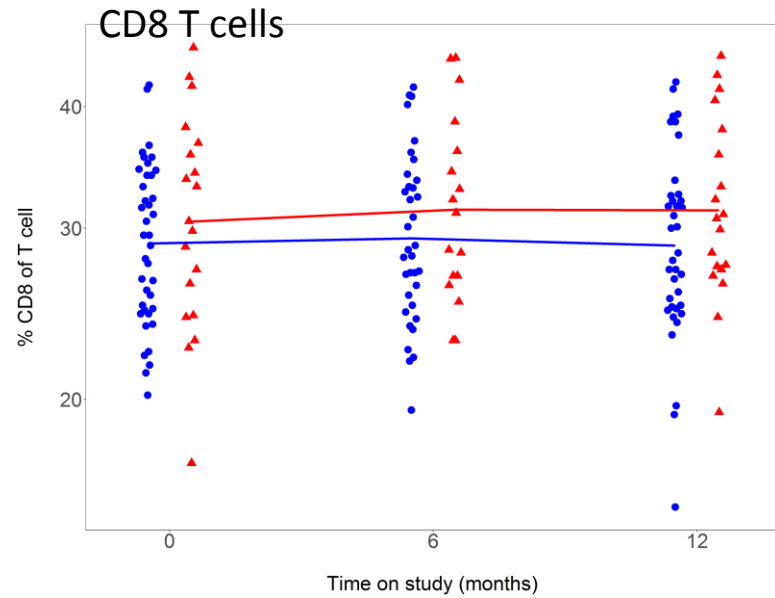

● Imatinib ▲ Placebo

# Supplementary Figure 5: Highly metabolically active rare cell subsets over time

A.

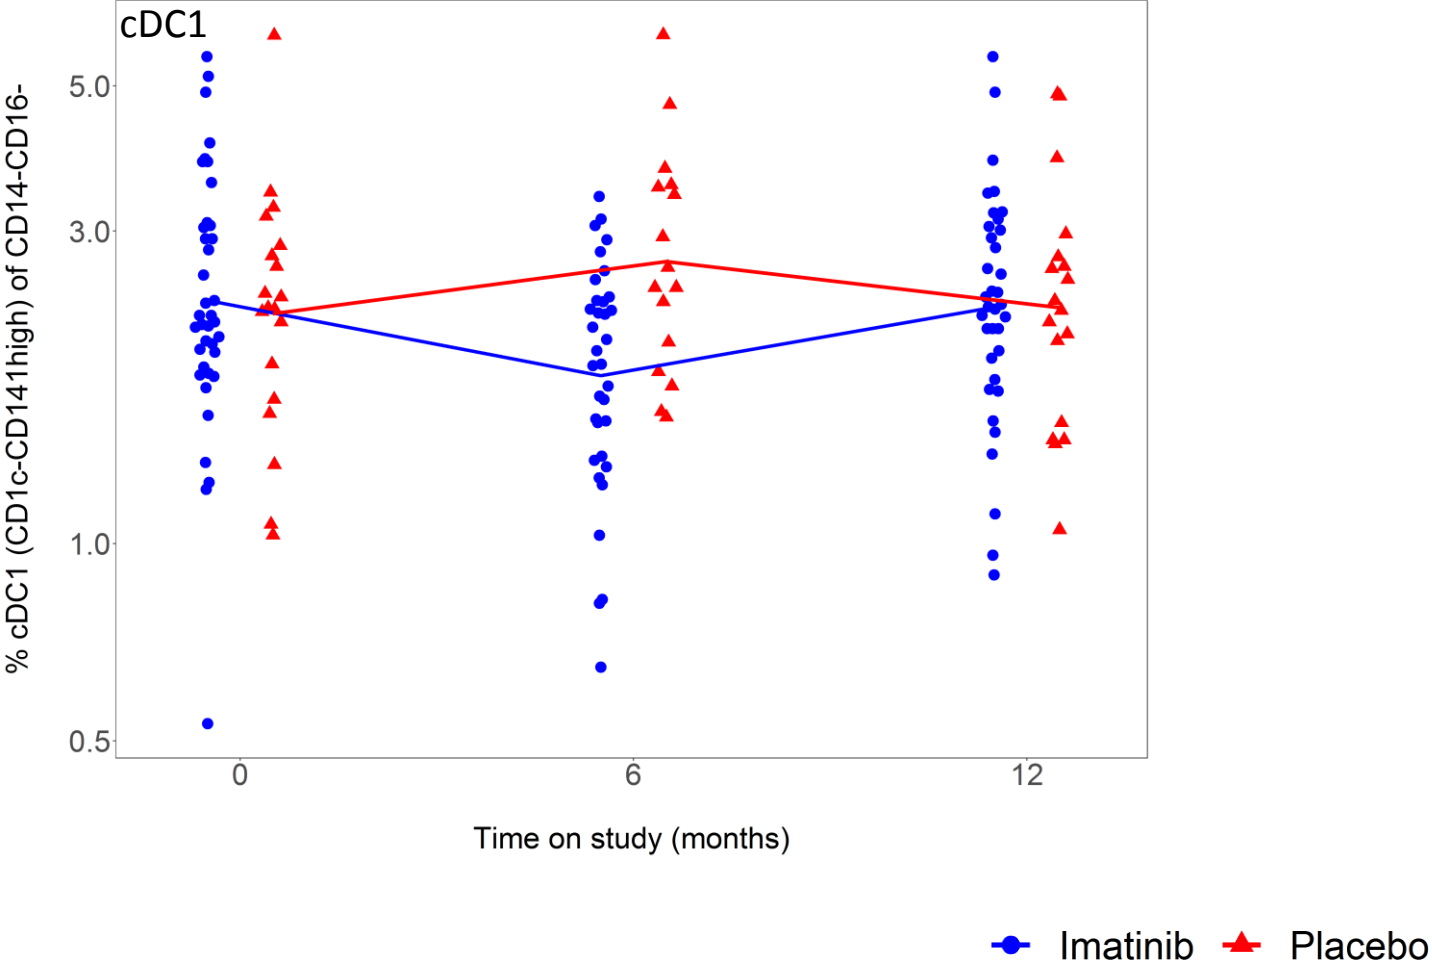

# Supplementary Figure 5: Highly metabolically active rare cell subsets over time (cont.)

B.

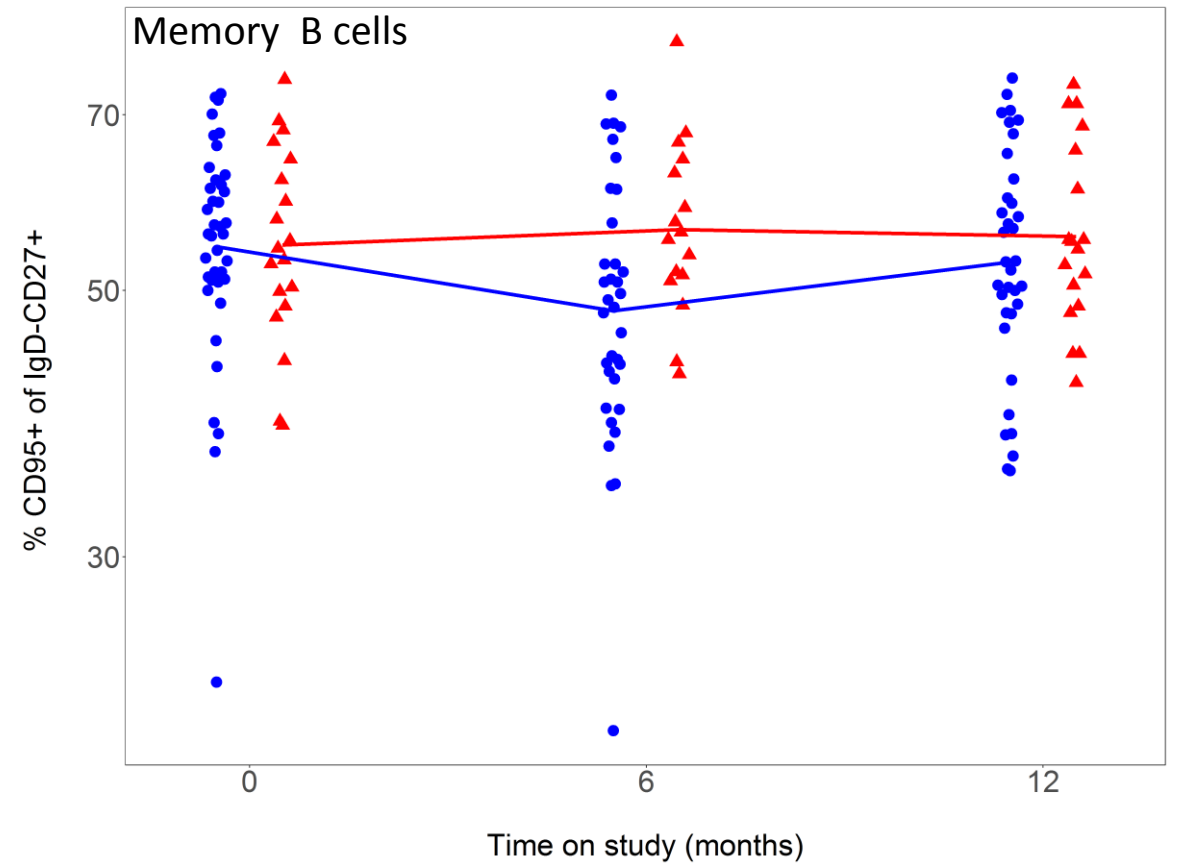

● Imatinib ▲ Placebo

# Supplementary Figure 6: Potentially protective immune cell subset populations in the upper versus lower quartile of C-peptide AUC responders in the imatinib group over time

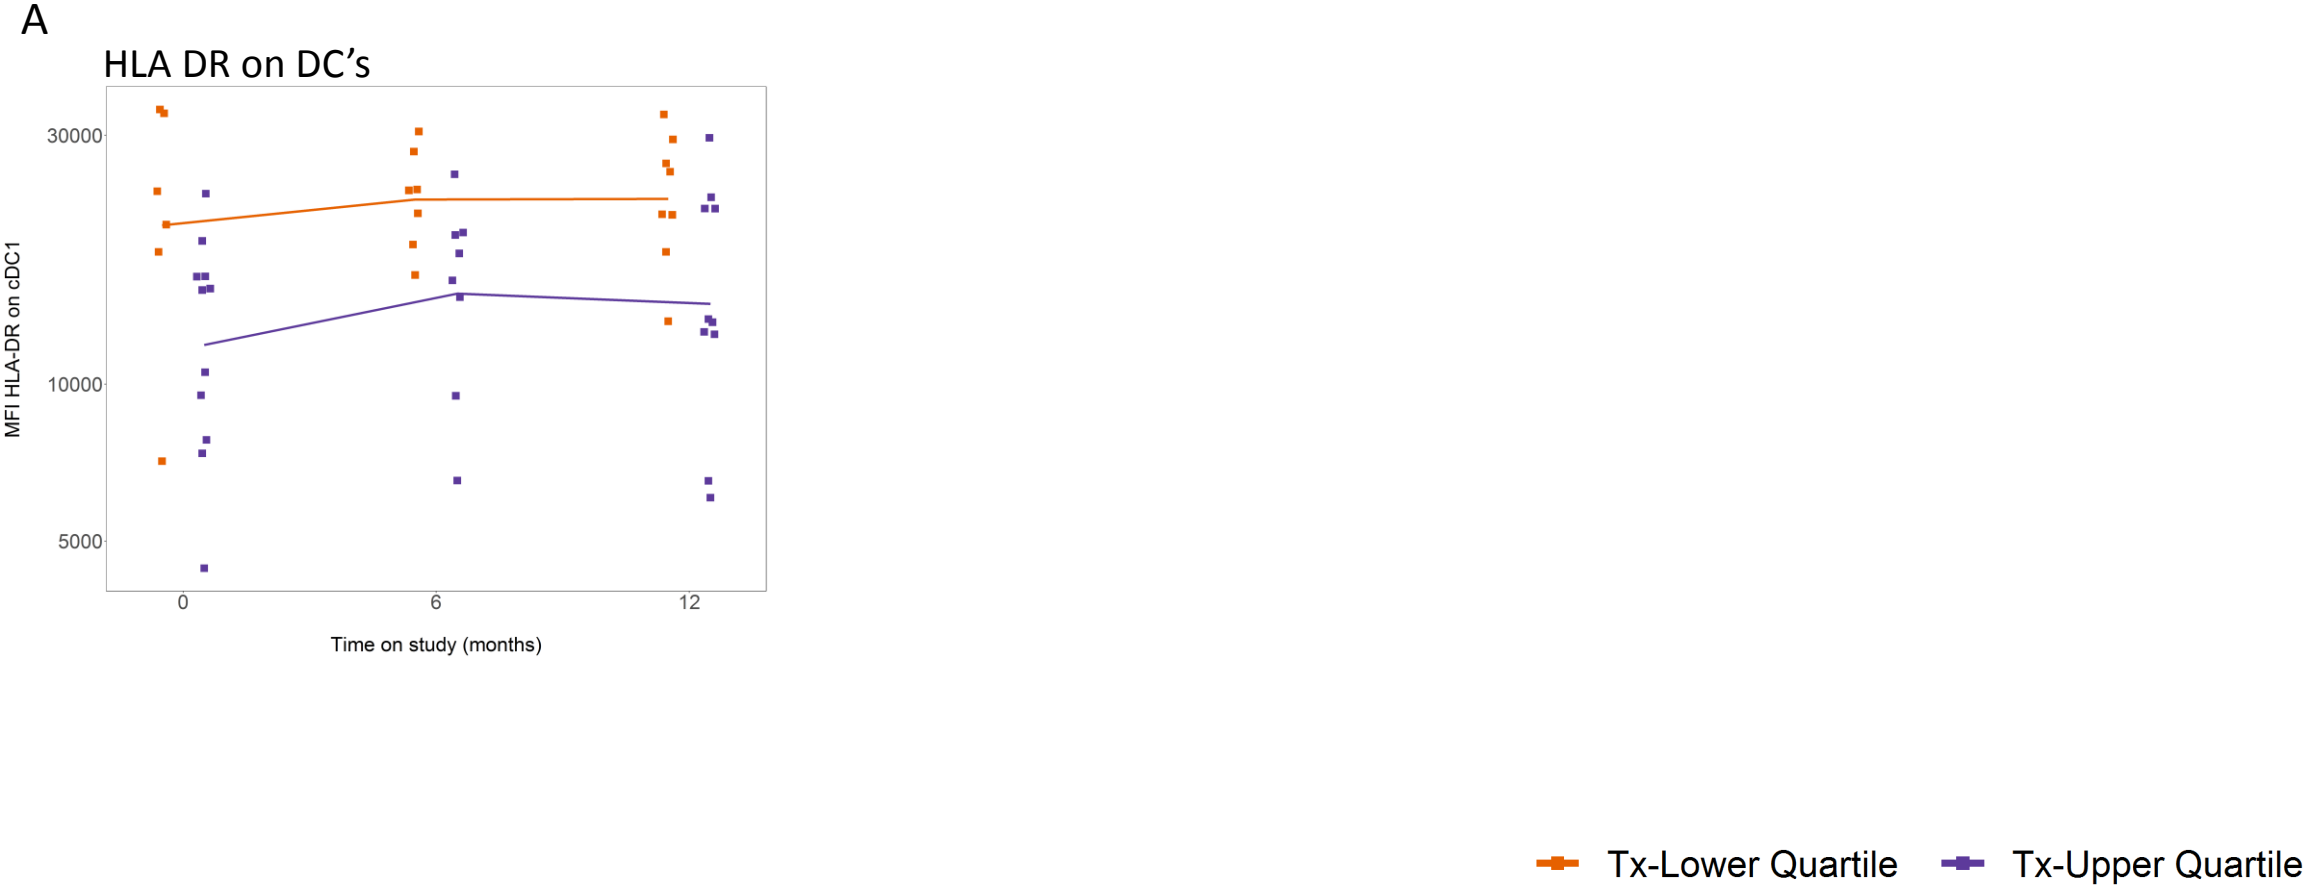

# Supplementary Figure 6: Potentially protective immune cell subset populations in the upper versus lower quartile of C-peptide AUC responders in the imatinib group over time (cont.)

B

Partially exhausted CD8 T cells

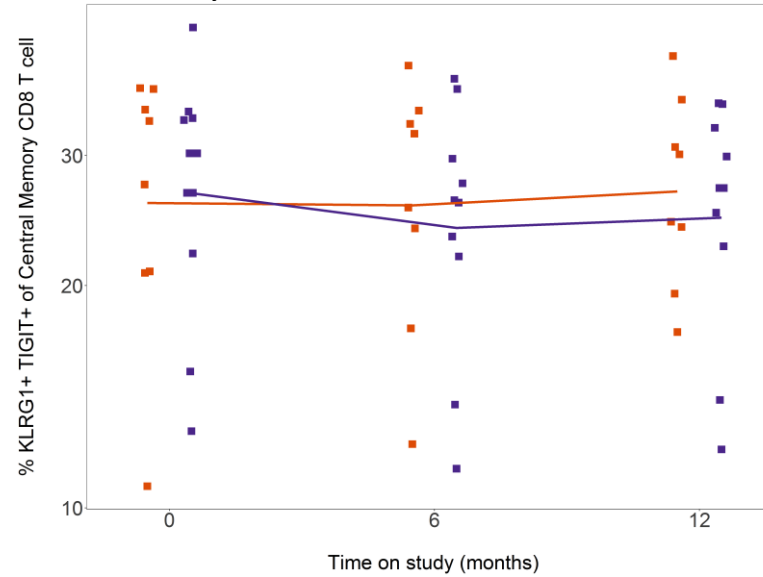

— Tx-Lower Quartile — Tx-Upper Quartile

Supplementary Figure 6: Potentially protective immune cell subset populations in the upper versus lower quartile of C-peptide AUC responders in the imatinib group over time (cont.)

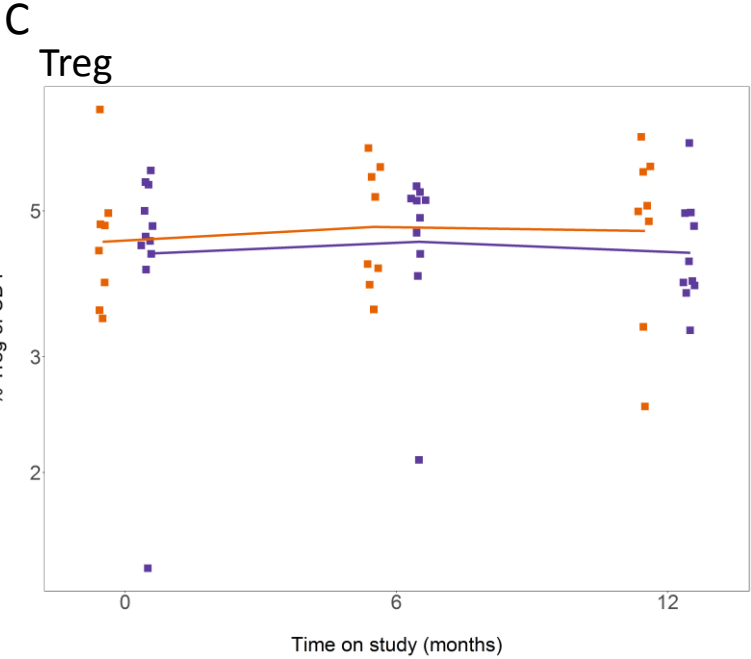

— Tx-Lower Quartile — Tx-Upper Quartile
